# Supplementary material for: Acquisition of the lac operon by Salmonella enterica
Source: BMC Microbiol. 2015 Aug 25;15:173. doi: 10.1186/s12866-015-0511-8 (PMC4549013; doi:10.1186/s12866-015-0511-8)
Supplement: Additional file 1: Figure S1. — Pairwise similarity matrix of the lacIZY sequences analyzed in this study. This matrix was generated by calculating the pairwise proportion distances in MEGA3 and then converting the resulting differences (p) to similarities (1-p). Values are color-coded from high to low on a green to red scale. (PDF 72 kb) [file 12866_2015_511_MOESM1_ESM.pdf]

| Order | Accession no. | Isolate                          | [01]   | [02]   | [03]   | [04]   | [05]   | [06]   | [07]   | [08]   | [09]   | [10]   | [11]   | [12]   | [13]   | [14]   | [15]   | [16]   | [17]   | [18]   | [19]   | [20]   | [21]   | [22]   | [23]   | [24]   | [25]   | [26]   | [27]   | [28]   | [29]   | [30]   | [31]   | [32]   | [33]   | [34]   | [35]   | [36]   | [37]   | [38]   | [39]   | [40]   |        |
|-------|---------------|----------------------------------|--------|--------|--------|--------|--------|--------|--------|--------|--------|--------|--------|--------|--------|--------|--------|--------|--------|--------|--------|--------|--------|--------|--------|--------|--------|--------|--------|--------|--------|--------|--------|--------|--------|--------|--------|--------|--------|--------|--------|--------|--------|
| [01]  | EF382672      | K. pneumoniae pK29               |        | 0.9996 | 0.9998 | 0.9998 | 0.9998 | 0.9998 | 0.9998 | 0.9998 | 0.9996 | 0.9996 | 0.9996 | 0.9989 | 0.9989 | 0.9945 | 0.9943 | 0.9943 | 0.9943 | 0.9943 | 0.9943 | 0.9935 | 0.9927 | 0.9931 | 0.9941 | 0.9941 | 0.9941 | 0.9941 | 0.9814 | 0.9788 | 0.9827 | 0.9833 | 0.9892 | 0.9894 | 0.9726 | 0.9685 | 0.9703 | 0.9727 | 0.9735 | 0.7315 | 0.7322 | 0.7318 |        |
| [02]  | JZT000000000  | S. enterica Senftenberg 50264    | 0.9996 |        | 0.9998 | 0.9998 | 0.9998 | 0.9998 | 0.9998 | 0.9998 | 0.9996 | 0.9996 | 0.9996 | 0.9989 | 0.9989 | 0.9945 | 0.9943 | 0.9943 | 0.9943 | 0.9943 | 0.9943 | 0.9935 | 0.9927 | 0.9931 | 0.9941 | 0.9941 | 0.9941 | 0.9941 | 0.9814 | 0.9788 | 0.9827 | 0.9833 | 0.9892 | 0.9894 | 0.9726 | 0.9685 | 0.9703 | 0.9727 | 0.9735 | 0.7315 | 0.7322 | 0.7318 |        |
| [03]  | JZTM000000000 | S. enterica Montevideo 50262     | 0.9998 | 0.9998 |        |        | 1      | 1      | 1      | 1      | 0.9998 | 0.9998 | 0.9998 | 0.9991 | 0.9991 | 0.9947 | 0.9945 | 0.9945 | 0.9945 | 0.9945 | 0.9945 | 0.9936 | 0.9929 | 0.9933 | 0.9943 | 0.9943 | 0.9943 | 0.9943 | 0.9816 | 0.9789 | 0.9829 | 0.9835 | 0.9894 | 0.9896 | 0.9727 | 0.9687 | 0.9704 | 0.9729 | 0.9736 | 0.7315 | 0.7322 | 0.7318 |        |
| [04]  | JZTN000000000 | S. enterica Senftenberg 50263    | 0.9998 | 0.9998 | 1      |        |        | 1      | 1      | 1      | 0.9998 | 0.9998 | 0.9998 | 0.9991 | 0.9991 | 0.9947 | 0.9945 | 0.9945 | 0.9945 | 0.9945 | 0.9945 | 0.9936 | 0.9929 | 0.9933 | 0.9943 | 0.9943 | 0.9943 | 0.9943 | 0.9816 | 0.9789 | 0.9829 | 0.9835 | 0.9894 | 0.9896 | 0.9727 | 0.9687 | 0.9704 | 0.9729 | 0.9736 | 0.7315 | 0.7322 | 0.7318 |        |
| [05]  | JZTP000000000 | S. enterica Senftenberg 50265    | 0.9998 | 0.9998 | 1      | 1      |        |        | 1      | 1      | 0.9998 | 0.9998 | 0.9998 | 0.9991 | 0.9991 | 0.9947 | 0.9945 | 0.9945 | 0.9945 | 0.9945 | 0.9945 | 0.9936 | 0.9929 | 0.9933 | 0.9943 | 0.9943 | 0.9943 | 0.9943 | 0.9816 | 0.9789 | 0.9829 | 0.9835 | 0.9894 | 0.9896 | 0.9727 | 0.9687 | 0.9704 | 0.9729 | 0.9736 | 0.7315 | 0.7322 | 0.7318 |        |
| [06]  | JZTT000000000 | S. enterica Montevideo 50270     | 0.9998 | 0.9998 | 1      | 1      | 1      |        |        | 1      | 0.9998 | 0.9998 | 0.9998 | 0.9991 | 0.9991 | 0.9947 | 0.9945 | 0.9945 | 0.9945 | 0.9945 | 0.9945 | 0.9936 | 0.9929 | 0.9933 | 0.9943 | 0.9943 | 0.9943 | 0.9943 | 0.9816 | 0.9789 | 0.9829 | 0.9835 | 0.9894 | 0.9896 | 0.9727 | 0.9687 | 0.9704 | 0.9729 | 0.9736 | 0.7315 | 0.7322 | 0.7318 |        |
| [07]  | JZTU000000000 | S. enterica Senftenberg 50271    | 0.9998 | 0.9998 | 1      | 1      | 1      |        |        | 1      | 0.9998 | 0.9998 | 0.9998 | 0.9991 | 0.9991 | 0.9947 | 0.9945 | 0.9945 | 0.9945 | 0.9945 | 0.9945 | 0.9936 | 0.9929 | 0.9933 | 0.9943 | 0.9943 | 0.9943 | 0.9943 | 0.9816 | 0.9789 | 0.9829 | 0.9835 | 0.9894 | 0.9896 | 0.9727 | 0.9687 | 0.9704 | 0.9729 | 0.9736 | 0.7315 | 0.7322 | 0.7318 |        |
| [08]  | JZTV000000000 | S. enterica Senftenberg 50272    | 0.9998 | 0.9998 | 1      | 1      | 1      | 1      |        | 1      | 0.9998 | 0.9998 | 0.9998 | 0.9991 | 0.9991 | 0.9947 | 0.9945 | 0.9945 | 0.9945 | 0.9945 | 0.9945 | 0.9936 | 0.9929 | 0.9933 | 0.9943 | 0.9943 | 0.9943 | 0.9943 | 0.9816 | 0.9789 | 0.9829 | 0.9835 | 0.9894 | 0.9896 | 0.9727 | 0.9687 | 0.9704 | 0.9729 | 0.9736 | 0.7315 | 0.7322 | 0.7318 |        |
| [09]  | JZTS000000000 | S. enterica Indiana 50269        | 0.9996 | 0.9996 | 0.9998 | 0.9998 | 0.9998 | 0.9998 | 0.9998 | 0.9998 |        | 1      | 1      | 0.9993 | 0.9993 | 0.9949 | 0.9947 | 0.9947 | 0.9947 | 0.9947 | 0.9947 | 0.9938 | 0.9931 | 0.9935 | 0.9945 | 0.9945 | 0.9945 | 0.9945 | 0.9818 | 0.9791 | 0.9831 | 0.9836 | 0.9896 | 0.9897 | 0.9729 | 0.9688 | 0.9706 | 0.9731 | 0.9738 | 0.7317 | 0.7324 | 0.732  |        |
| [10]  | CP006731      | C. sakazakii CMCC 45402          | 0.9996 | 0.9996 | 0.9998 | 0.9998 | 0.9998 | 0.9998 | 0.9998 | 0.9998 | 1      |        | 1      | 0.9993 | 0.9993 | 0.9949 | 0.9947 | 0.9947 | 0.9947 | 0.9947 | 0.9947 | 0.9938 | 0.9931 | 0.9935 | 0.9945 | 0.9945 | 0.9945 | 0.9945 | 0.9818 | 0.9791 | 0.9831 | 0.9836 | 0.9896 | 0.9897 | 0.9729 | 0.9688 | 0.9706 | 0.9731 | 0.9738 | 0.7317 | 0.7324 | 0.732  |        |
| [11]  | CP010377      | E. cloacae 34983                 | 0.9996 | 0.9996 | 0.9998 | 0.9998 | 0.9998 | 0.9998 | 0.9998 | 0.9998 | 1      | 1      |        | 0.9993 | 0.9993 | 0.9949 | 0.9947 | 0.9947 | 0.9947 | 0.9947 | 0.9947 | 0.9938 | 0.9931 | 0.9935 | 0.9945 | 0.9945 | 0.9945 | 0.9945 | 0.9818 | 0.9791 | 0.9831 | 0.9836 | 0.9896 | 0.9897 | 0.9729 | 0.9688 | 0.9706 | 0.9731 | 0.9738 | 0.7317 | 0.7324 | 0.732  |        |
| [12]  | CP004091      | C. sakazakii SP291               | 0.9989 | 0.9989 | 0.9991 | 0.9991 | 0.9991 | 0.9991 | 0.9991 | 0.9991 | 0.9993 | 0.9993 | 0.9993 |        | 0.9996 | 0.9949 | 0.9947 | 0.9947 | 0.9947 | 0.9947 | 0.9947 | 0.9938 | 0.9931 | 0.9935 | 0.9945 | 0.9945 | 0.9945 | 0.9945 | 0.9811 | 0.9784 | 0.9827 | 0.9833 | 0.9896 | 0.9897 | 0.9726 | 0.9685 | 0.9703 | 0.9727 | 0.9735 | 0.7317 | 0.7324 | 0.732  |        |
| [13]  | CP001918      | E. cloacae ATCC 13047            | 0.9989 | 0.9989 | 0.9991 | 0.9991 | 0.9991 | 0.9991 | 0.9991 | 0.9991 | 0.9993 | 0.9993 | 0.9993 | 0.9996 |        | 0.9949 | 0.9947 | 0.9947 | 0.9947 | 0.9947 | 0.9947 | 0.9938 | 0.9931 | 0.9935 | 0.9945 | 0.9945 | 0.9945 | 0.9945 | 0.9811 | 0.9784 | 0.9827 | 0.9833 | 0.9896 | 0.9897 | 0.9726 | 0.9685 | 0.9703 | 0.9727 | 0.9735 | 0.7313 | 0.732  | 0.7317 |        |
| [14]  | CP008842      | K. oxytoca pKOXM1A               | 0.9945 | 0.9945 | 0.9947 | 0.9947 | 0.9947 | 0.9947 | 0.9947 | 0.9947 | 0.9949 | 0.9949 | 0.9949 | 0.9949 | 0.9949 |        | 0.9998 | 0.9998 | 0.9998 | 0.9998 | 0.9998 | 0.9988 | 0.9979 | 0.9982 | 0.9918 | 0.9918 | 0.9918 | 0.9918 | 0.9858 | 0.9832 | 0.9797 | 0.9803 | 0.9858 | 0.986  | 0.9685 | 0.9667 | 0.9683 | 0.9697 | 0.9704 | 0.7318 | 0.7324 | 0.732  |        |
| [15]  | CP006648      | K. pneumoniae pKPN3              | 0.9943 | 0.9943 | 0.9945 | 0.9945 | 0.9945 | 0.9945 | 0.9945 | 0.9945 | 0.9947 | 0.9947 | 0.9947 | 0.9947 | 0.9947 | 0.9998 |        | 1      | 1      | 1      | 1      | 0.9989 | 0.9981 | 0.9984 | 0.9917 | 0.9917 | 0.9917 | 0.9917 | 0.986  | 0.9834 | 0.9799 | 0.9804 | 0.986  | 0.9862 | 0.9687 | 0.9669 | 0.9685 | 0.9699 | 0.9706 | 0.7318 | 0.7324 | 0.732  |        |
| [16]  | CP006657      | K. pneumoniae p1                 | 0.9943 | 0.9943 | 0.9945 | 0.9945 | 0.9945 | 0.9945 | 0.9945 | 0.9945 | 0.9947 | 0.9947 | 0.9947 | 0.9947 | 0.9947 | 0.9998 | 1      |        | 1      | 1      | 1      | 0.9989 | 0.9981 | 0.9984 | 0.9917 | 0.9917 | 0.9917 | 0.9917 | 0.986  | 0.9834 | 0.9799 | 0.9804 | 0.986  | 0.9862 | 0.9687 | 0.9669 | 0.9685 | 0.9699 | 0.9706 | 0.7318 | 0.7324 | 0.732  |        |
| [17]  | CP006927      | K. pneumoniae p30660_1           | 0.9943 | 0.9943 | 0.9945 | 0.9945 | 0.9945 | 0.9945 | 0.9945 | 0.9945 | 0.9947 | 0.9947 | 0.9947 | 0.9947 | 0.9947 | 0.9998 | 1      | 1      |        | 1      | 1      | 0.9989 | 0.9981 | 0.9984 | 0.9917 | 0.9917 | 0.9917 | 0.9917 | 0.986  | 0.9834 | 0.9799 | 0.9804 | 0.986  | 0.9862 | 0.9687 | 0.9669 | 0.9685 | 0.9699 | 0.9706 | 0.7318 | 0.7324 | 0.732  |        |
| [18]  | JN233704      | K. pneumoniae pKPN-IT            | 0.9943 | 0.9943 | 0.9945 | 0.9945 | 0.9945 | 0.9945 | 0.9945 | 0.9945 | 0.9947 | 0.9947 | 0.9947 | 0.9947 | 0.9947 | 0.9998 | 1      | 1      | 1      |        | 1      | 0.9989 | 0.9981 | 0.9984 | 0.9917 | 0.9917 | 0.9917 | 0.9917 | 0.986  | 0.9834 | 0.9799 | 0.9804 | 0.986  | 0.9862 | 0.9687 | 0.9669 | 0.9685 | 0.9699 | 0.9706 | 0.7318 | 0.7324 | 0.732  |        |
| [19]  | JX442974      | K. pneumoniae pKN-LS6            | 0.9943 | 0.9943 | 0.9945 | 0.9945 | 0.9945 | 0.9945 | 0.9945 | 0.9945 | 0.9947 | 0.9947 | 0.9947 | 0.9947 | 0.9947 | 0.9998 | 1      | 1      | 1      | 1      |        | 0.9989 | 0.9981 | 0.9984 | 0.9917 | 0.9917 | 0.9917 | 0.9917 | 0.986  | 0.9834 | 0.9799 | 0.9804 | 0.986  | 0.9862 | 0.9687 | 0.9669 | 0.9685 | 0.9699 | 0.9706 | 0.7318 | 0.7324 | 0.732  |        |
| [20]  | F0834905      | K. pneumoniae pKP52.145_II       | 0.9935 | 0.9935 | 0.9936 | 0.9936 | 0.9936 | 0.9936 | 0.9936 | 0.9936 | 0.9938 | 0.9938 | 0.9938 | 0.9938 | 0.9938 | 0.9988 | 0.9989 | 0.9989 | 0.9989 | 0.9989 | 0.9989 |        | 0.9977 | 0.9981 | 0.9913 | 0.9913 | 0.9913 | 0.9913 | 0.9857 | 0.983  | 0.9799 | 0.9804 | 0.9858 | 0.9862 | 0.9681 | 0.9667 | 0.9681 | 0.9701 | 0.9703 | 0.7318 | 0.7324 | 0.732  |        |
| [21]  | JX424424      | K. pneumoniae pKPN_CZ            | 0.9927 | 0.9927 | 0.9929 | 0.9929 | 0.9929 | 0.9929 | 0.9929 | 0.9929 | 0.9931 | 0.9931 | 0.9931 | 0.9931 | 0.9931 | 0.9979 | 0.9981 | 0.9981 | 0.9981 | 0.9981 | 0.9981 | 0.9977 |        | 0.9986 | 0.9901 | 0.9901 | 0.9901 | 0.9901 | 0.9848 | 0.9821 | 0.979  | 0.9795 | 0.9851 | 0.985  | 0.9674 | 0.9658 | 0.9678 | 0.9694 | 0.9699 | 0.7318 | 0.732  | 0.7317 |        |
| [22]  | KF719971      | K. pneumoniae pKP007             | 0.9931 | 0.9931 | 0.9933 | 0.9933 | 0.9933 | 0.9933 | 0.9933 | 0.9933 | 0.9935 | 0.9935 | 0.9935 | 0.9935 | 0.9935 | 0.9982 | 0.9984 | 0.9984 | 0.9984 | 0.9984 | 0.9984 | 0.9981 | 0.9986 |        | 0.9904 | 0.9904 | 0.9904 | 0.9851 | 0.9825 | 0.979  | 0.9795 | 0.9851 | 0.9853 | 0.9674 | 0.9658 | 0.9674 | 0.969  | 0.9699 | 0.7322 | 0.7327 | 0.7324 |        |        |
| [23]  | JZTI000000000 | S. enterica Tennessee 50259      | 0.9941 | 0.9941 | 0.9943 | 0.9943 | 0.9943 | 0.9943 | 0.9943 | 0.9943 | 0.9945 | 0.9945 | 0.9945 | 0.9945 | 0.9945 | 0.9918 | 0.9917 | 0.9917 | 0.9917 | 0.9917 | 0.9917 | 0.9913 | 0.9901 | 0.9904 |        |        | 1      | 1      | 1      | 0.9815 | 0.9789 | 0.9868 | 0.9874 | 0.9874 | 0.9878 | 0.9704 | 0.9673 | 0.9693 | 0.9716 | 0.9725 | 0.7317 | 0.7328 | 0.7322 |
| [24]  | JZTK000000000 | S. enterica Tennessee 50260 lac1 | 0.9941 | 0.9941 | 0.9943 | 0.9943 | 0.9943 | 0.9943 | 0.9943 | 0.9943 | 0.9945 | 0.9945 | 0.9945 | 0.9945 | 0.9945 | 0.9918 | 0.9917 | 0.9917 | 0.9917 | 0.9917 | 0.9917 | 0.9913 | 0.9901 | 0.9904 | 1      |        | 1      | 1      | 0.9815 | 0.9789 | 0.9868 | 0.9874 | 0.9874 | 0.9878 | 0.9704 | 0.9673 | 0.9693 | 0.9716 | 0.9725 | 0.7317 | 0.7328 | 0.7322 |        |
| [25]  | JZTL000000000 | S. enterica Tennessee 50261 lac1 | 0.9941 | 0.9941 | 0.9943 | 0.9943 | 0.9943 | 0.9943 | 0.9943 | 0.9943 | 0.9945 | 0.9945 | 0.9945 | 0.9945 | 0.9945 | 0.9918 | 0.9917 | 0.9917 | 0.9917 | 0.9917 | 0.9917 | 0.9913 | 0.9901 | 0.9904 | 1      | 1      |        | 1      | 0.9815 | 0.9789 | 0.9868 | 0.9874 | 0.9874 | 0.9878 | 0.9704 | 0.9673 | 0.9693 | 0.9716 | 0.9725 | 0.7317 | 0.7328 | 0.7322 |        |
| [26]  | AHU010100000  | S. enterica Tennessee 4535       | 0.9941 | 0.9941 | 0.9943 | 0.9943 | 0.9943 | 0.9943 | 0.9943 | 0.9943 | 0.9945 | 0.9945 | 0.9945 | 0.9945 | 0.9945 | 0.9918 | 0.9917 | 0.9917 | 0.9917 | 0.9917 | 0.9917 | 0.9913 | 0.9901 | 0.9904 | 1      | 1      | 1      |        | 0.9815 | 0.9789 | 0.9868 | 0.9874 | 0.9874 | 0.9878 | 0.9704 | 0.9673 | 0.9693 | 0.9716 | 0.9725 | 0.7317 | 0.7328 | 0.7322 |        |
| [27]  | CP008843      | K. oxytoca pKOXM1B               | 0.9814 | 0.9814 | 0.9816 | 0.9816 | 0.9816 | 0.9816 | 0.9816 | 0.9816 | 0.9818 | 0.98   |        |        |        |        |        |        |        |        |        |        |        |        |        |        |        |        |        |        |        |        |        |        |        |        |        |        |        |        |        |        |        |
